# Supplementary material for: Smenamide A Analogues. Synthesis and Biological Activity on Multiple Myeloma Cells
Source: PubMed Central journal article supplement (PMC6025564; doi:10.3390/md16060206), 2018-06-13
Supplement: marinedrugs-16-00206-s001.pdf [file marinedrugs-16-00206-s001.pdf]

# **Smenamide A analogues. Synthesis and biological activity on multiple myeloma cells.**

**Alessia Caso <sup>1,§</sup>, Ilaria Laurenzana <sup>2,§</sup>, Daniela Lamorte <sup>2</sup>, Stefania Trino <sup>2</sup>, Germana Esposito <sup>1</sup>, Vincenzo Piccialli <sup>3,\*</sup>, and Valeria Costantino <sup>1\*</sup>**

<sup>1</sup> Department of Pharmacy, University of Naples Federico II, 80131 Napoli, Italy;

<sup>2</sup> Laboratory of Pre-Clinical and Translational Research, IRCCS—Referral Cancer Center of Basilicata (CROB), 85028 Rionero in Vulture (PZ), Italy;

<sup>3</sup> Department of Chemical Sciences, University of Naples Federico II, via Cintia 4, 80126 Naples, Italy.

## Supplementary Material

**Figure S1:**  $^1\text{H}$  NMR spectrum of compound **16** ( $\text{CDCl}_3$ , 400 MHz).

**Figure S2:**  $^{13}\text{C}$  NMR spectrum of compound **16** ( $\text{CDCl}_3$ , 100 MHz).

**Figure S3:**  $^1\text{H}$  NMR spectrum of compound **8** ( $\text{CDCl}_3$ , 400 MHz).

**Figure S4:**  $^{13}\text{C}$  NMR spectrum of compound **8** ( $\text{CDCl}_3$ , 100 MHz).

**Figure S5:**  $^1\text{H}$  NMR spectrum of compound **10** ( $\text{CDCl}_3$ , 400 MHz).

**Figure S6:**  $^{13}\text{C}$  NMR spectrum of compound **10** ( $\text{CDCl}_3$ , 100 MHz).

**Figure S7:**  $^1\text{H}$  NMR spectrum of compound **11** ( $\text{CDCl}_3$ , 400 MHz).

**Figure S8:**  $^{13}\text{C}$  NMR spectrum of compound **11** ( $\text{CDCl}_3$ , 100 MHz).

**Figure S9:**  $^1\text{H}$  NMR spectrum of compound **12** ( $\text{CDCl}_3$ , 400 MHz).

**Figure S10:**  $^{13}\text{C}$  NMR spectrum of compound **12** ( $\text{CDCl}_3$ , 100 MHz).

**Figure S11:**  $^1\text{H}$  NMR spectrum of compound **22** ( $\text{CDCl}_3$ , 400 MHz).

**Figure S12:**  $^{13}\text{C}$  NMR spectrum of compound **22** ( $\text{CDCl}_3$ , 100 MHz).

**Figure S13:**  $^1\text{H}$  NMR spectrum of compound **14** ( $\text{CDCl}_3$ , 400 MHz).

**Figure S14:**  $^{13}\text{C}$  NMR spectrum of compound **14** ( $\text{CDCl}_3$ , 100 MHz).

**Figure S15:**  $^1\text{H}$  NMR spectrum of compound **15** ( $\text{CDCl}_3$ , 400 MHz).

**Figure S16:**  $^{13}\text{C}$  NMR spectrum of compound **15** ( $\text{CDCl}_3$ , 100 MHz).

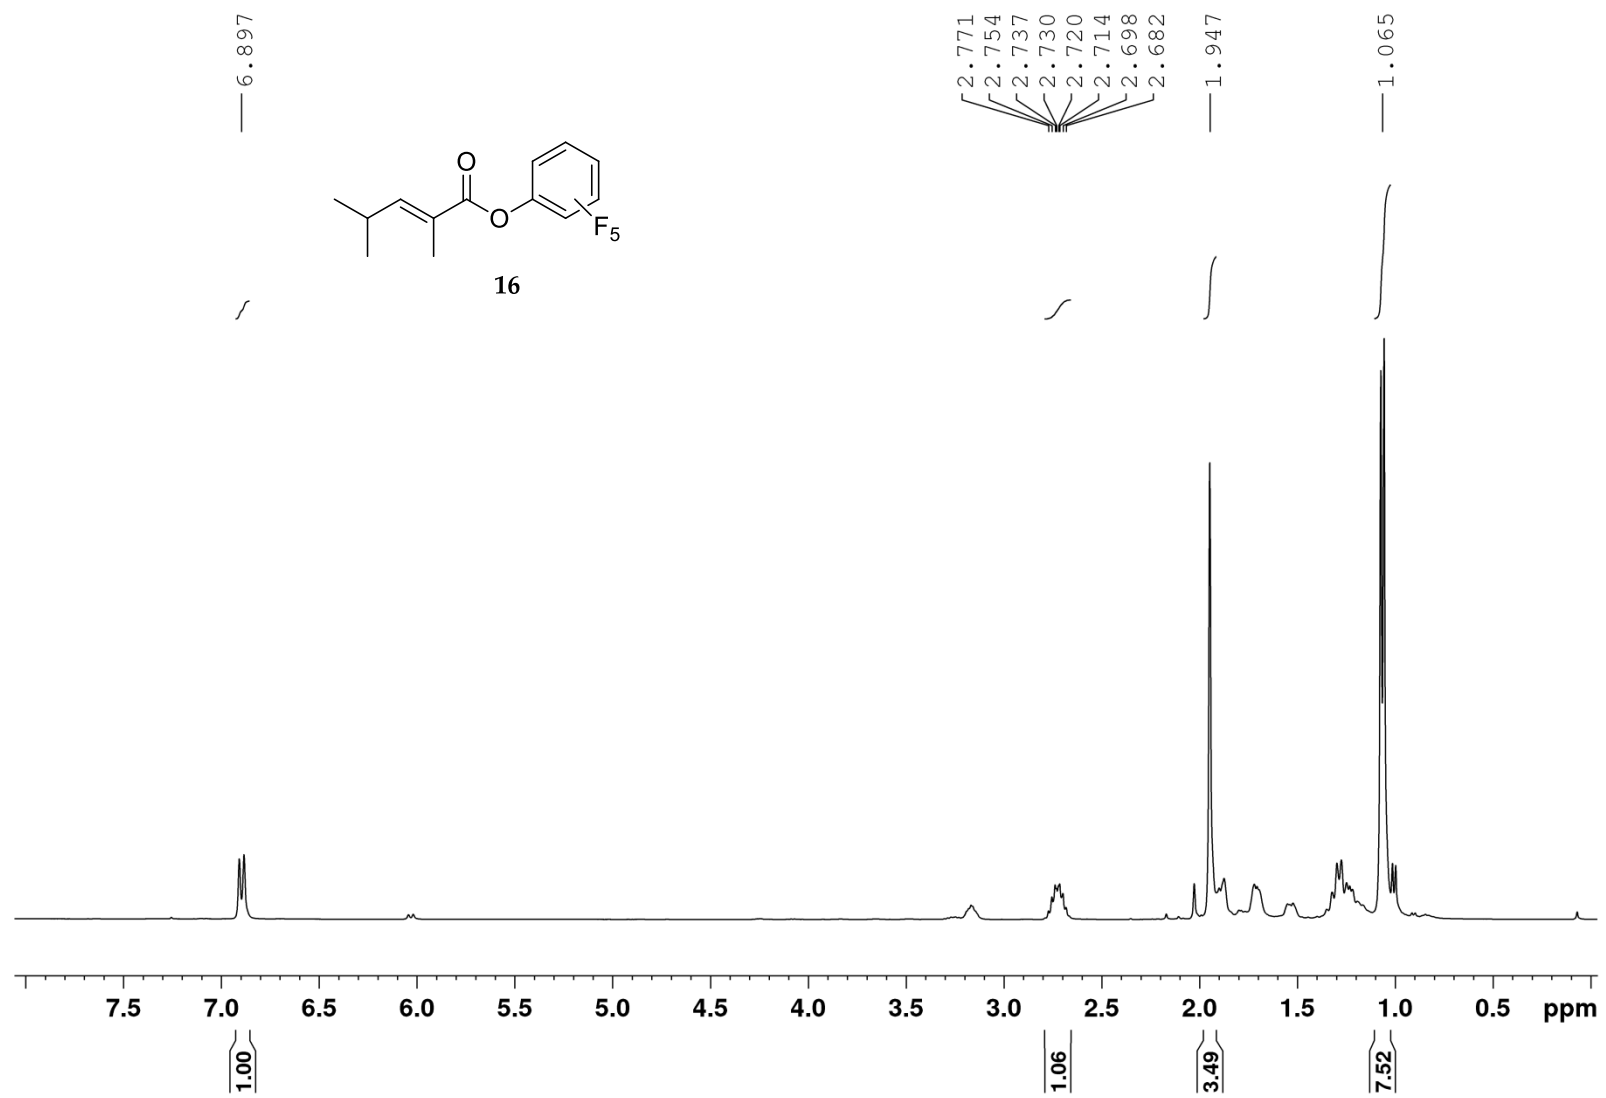

Figure S1. <sup>1</sup>H NMR spectrum of compound 16 (CDCl<sub>3</sub>, 400 MHz).

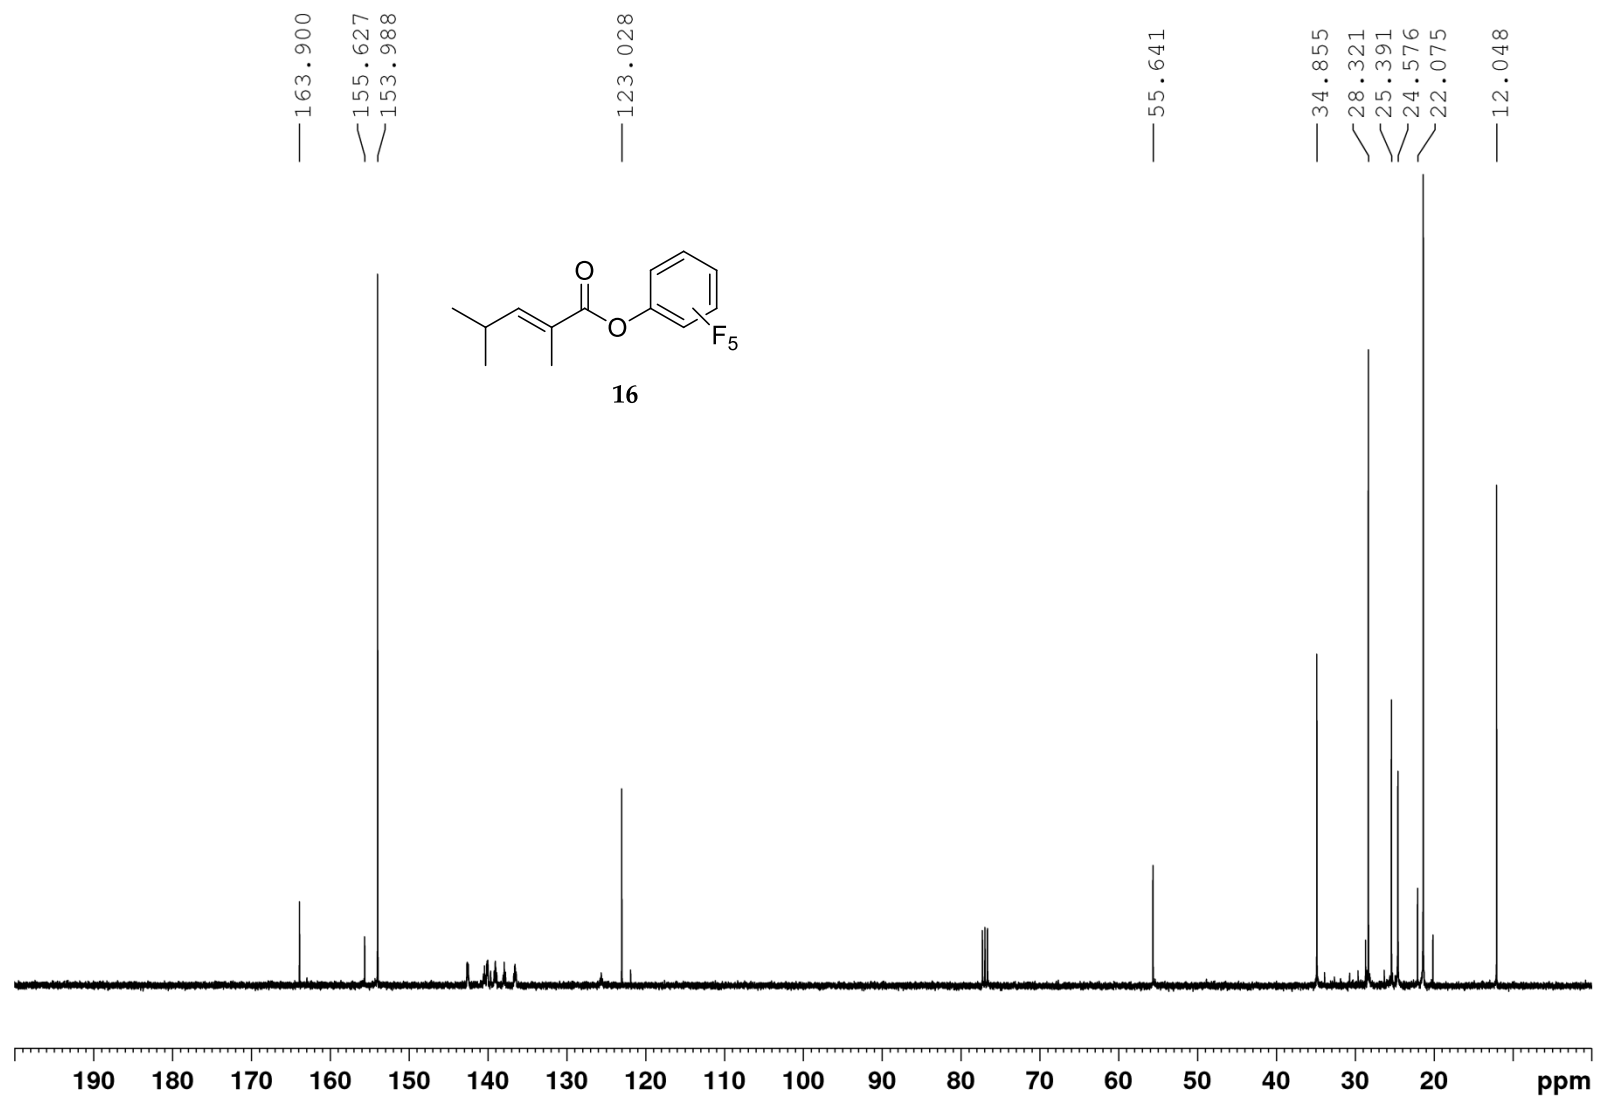

Figure S2.  $^{13}\text{C}$  NMR spectrum of compound **16** (CDCl<sub>3</sub>, 100 MHz).

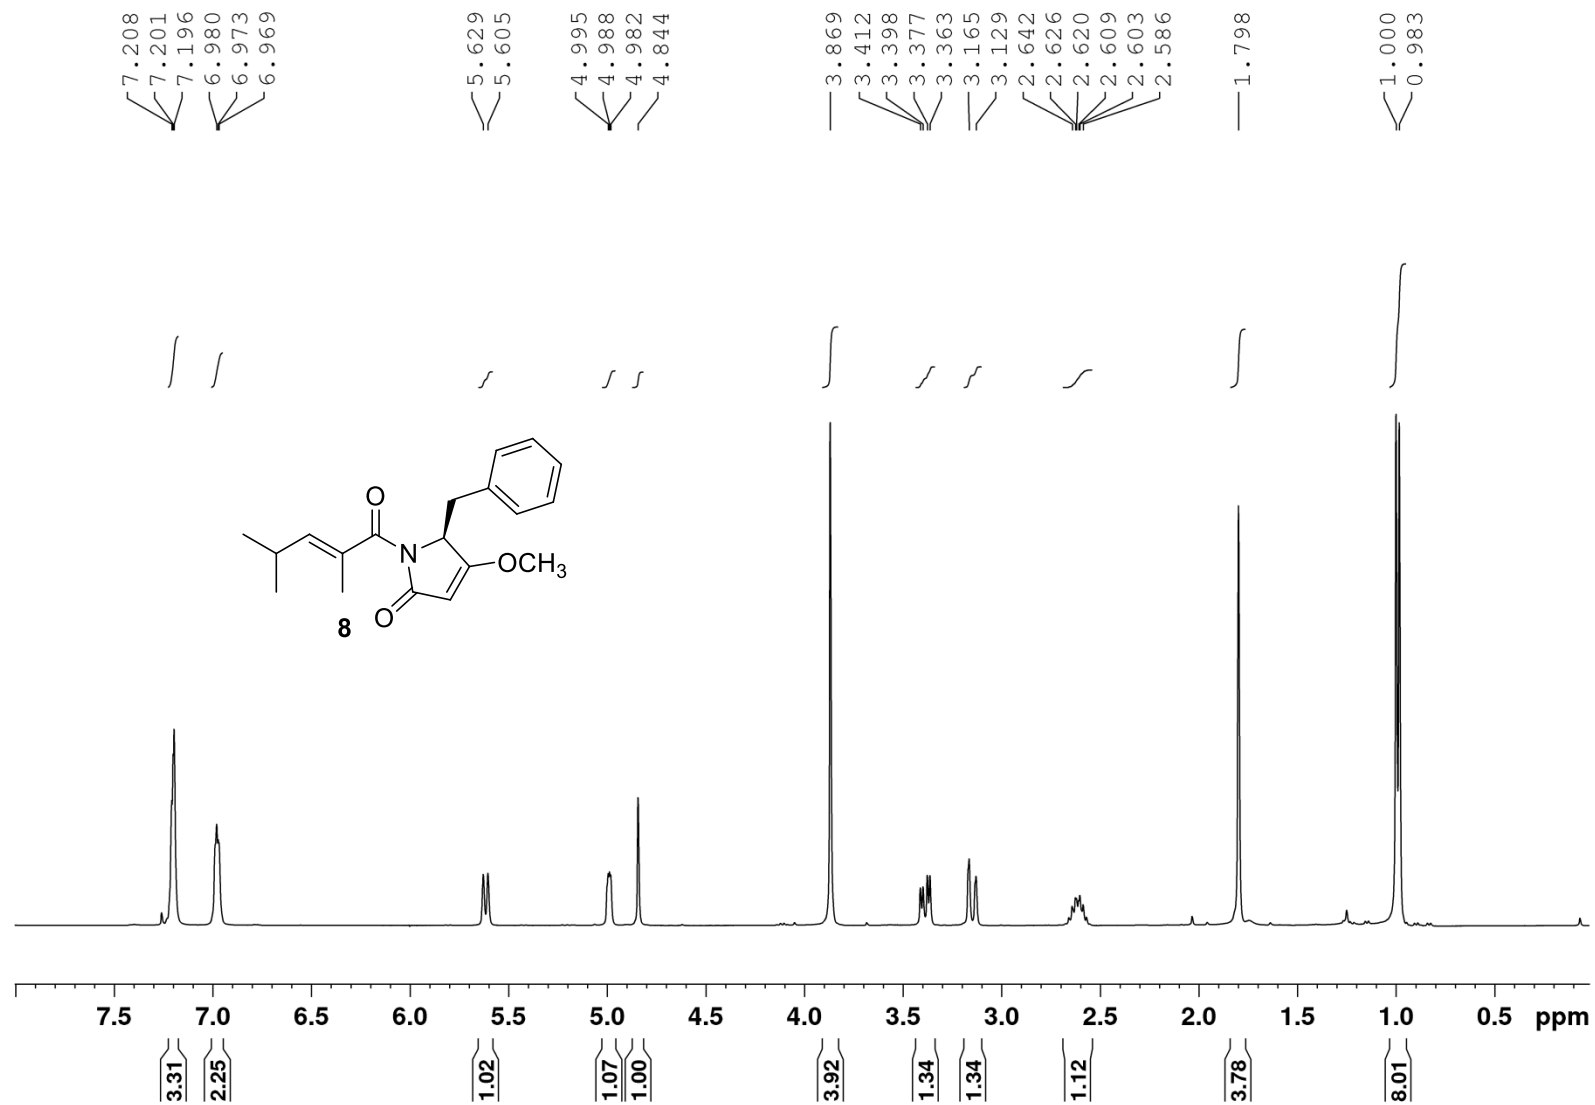

Figure S3. <sup>1</sup>H NMR spectrum of compound 8 (CDCl<sub>3</sub>, 400 MHz).

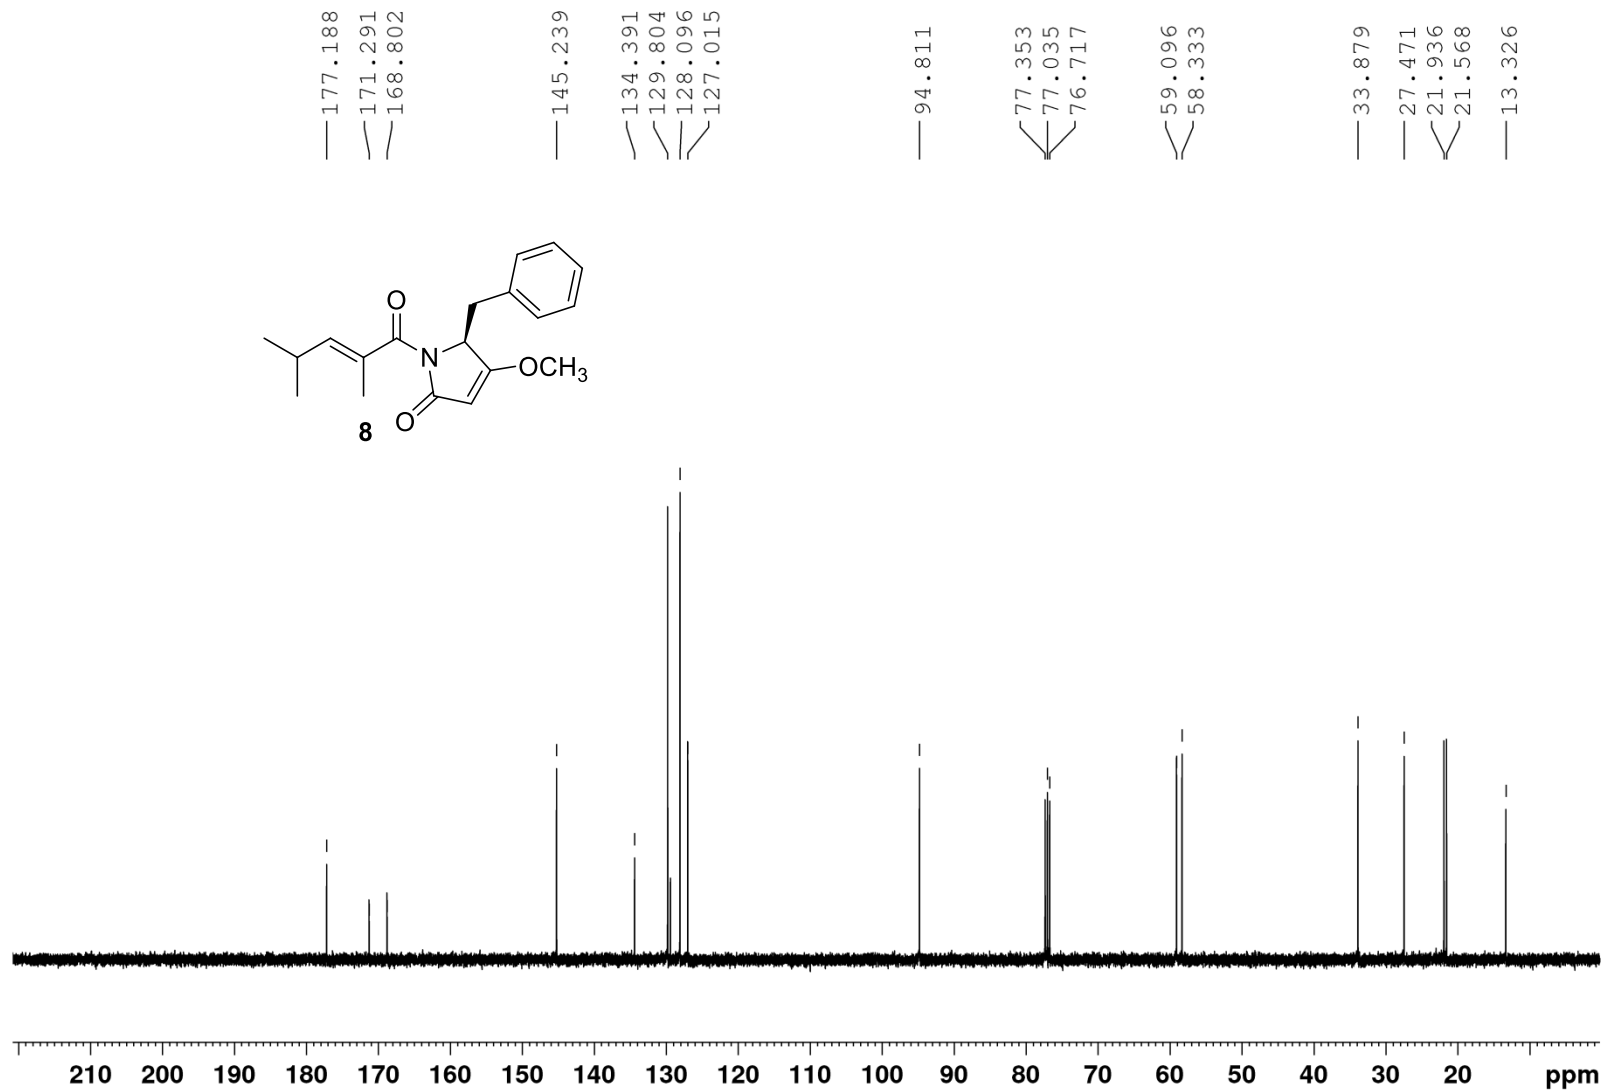

Figure S4. <sup>13</sup>C NMR spectrum of compound 8 (CDCl<sub>3</sub>, 100 MHz).

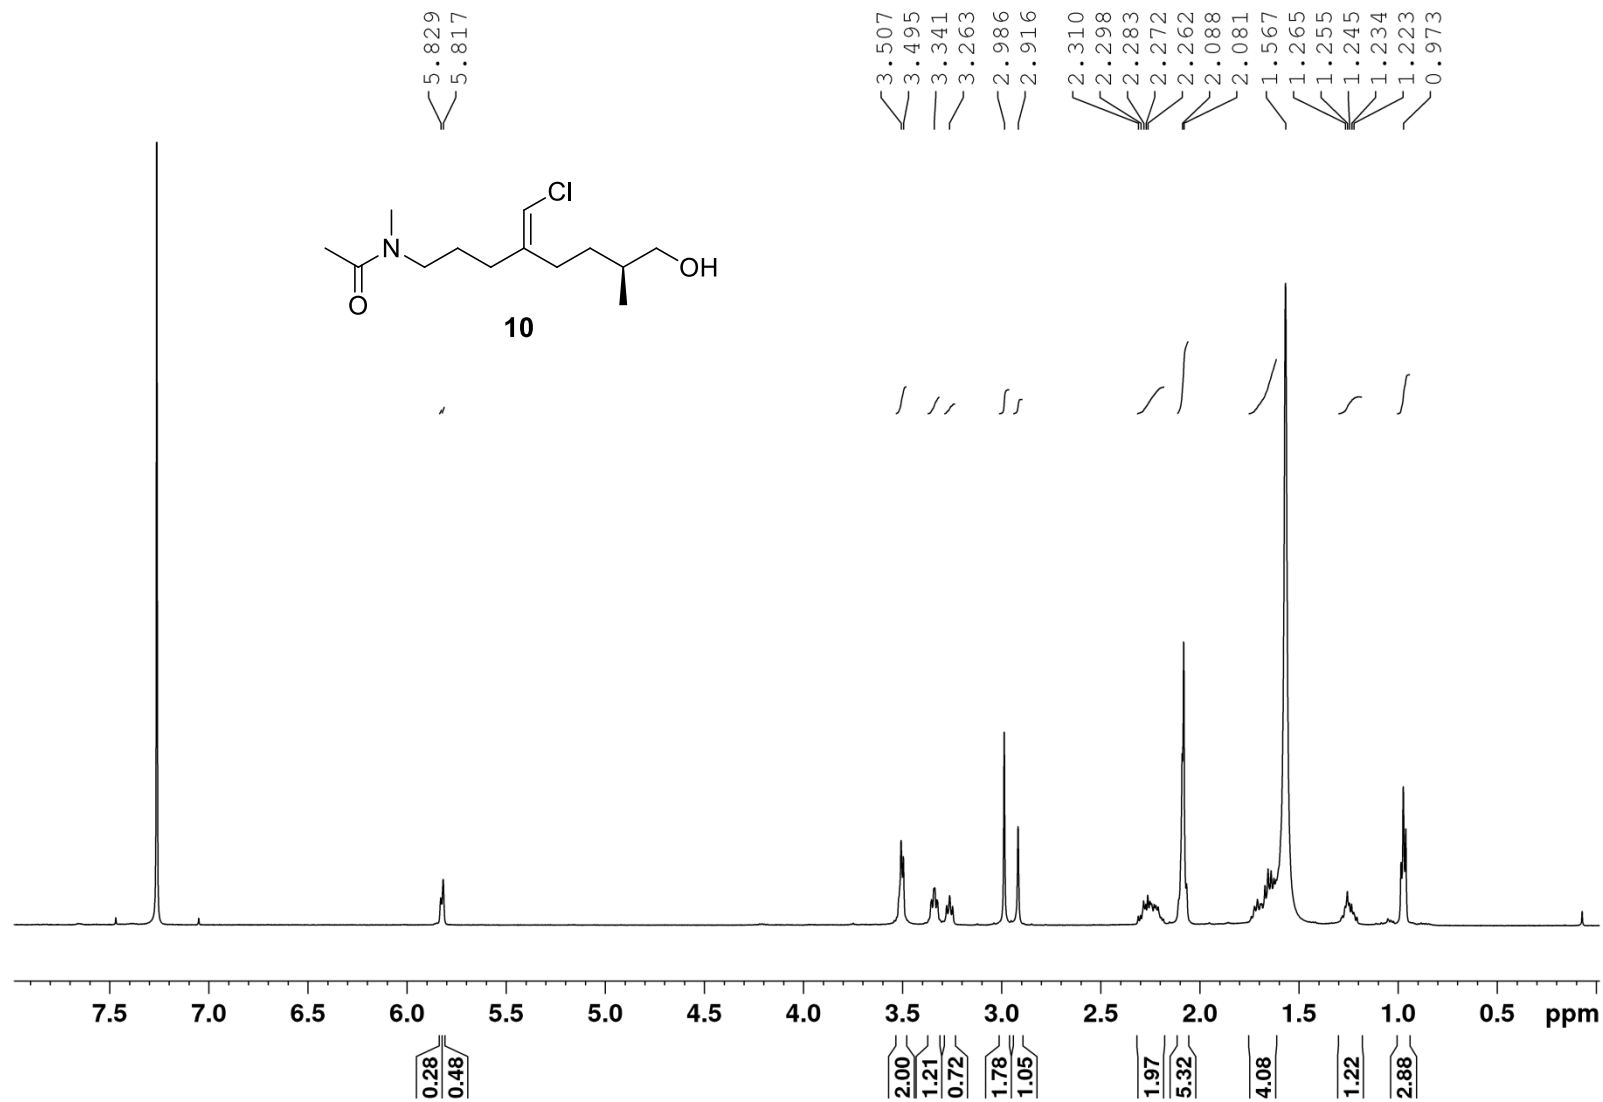

Figure S5. <sup>1</sup>H NMR spectrum of compound 10 (CDCl<sub>3</sub>, 400 MHz).

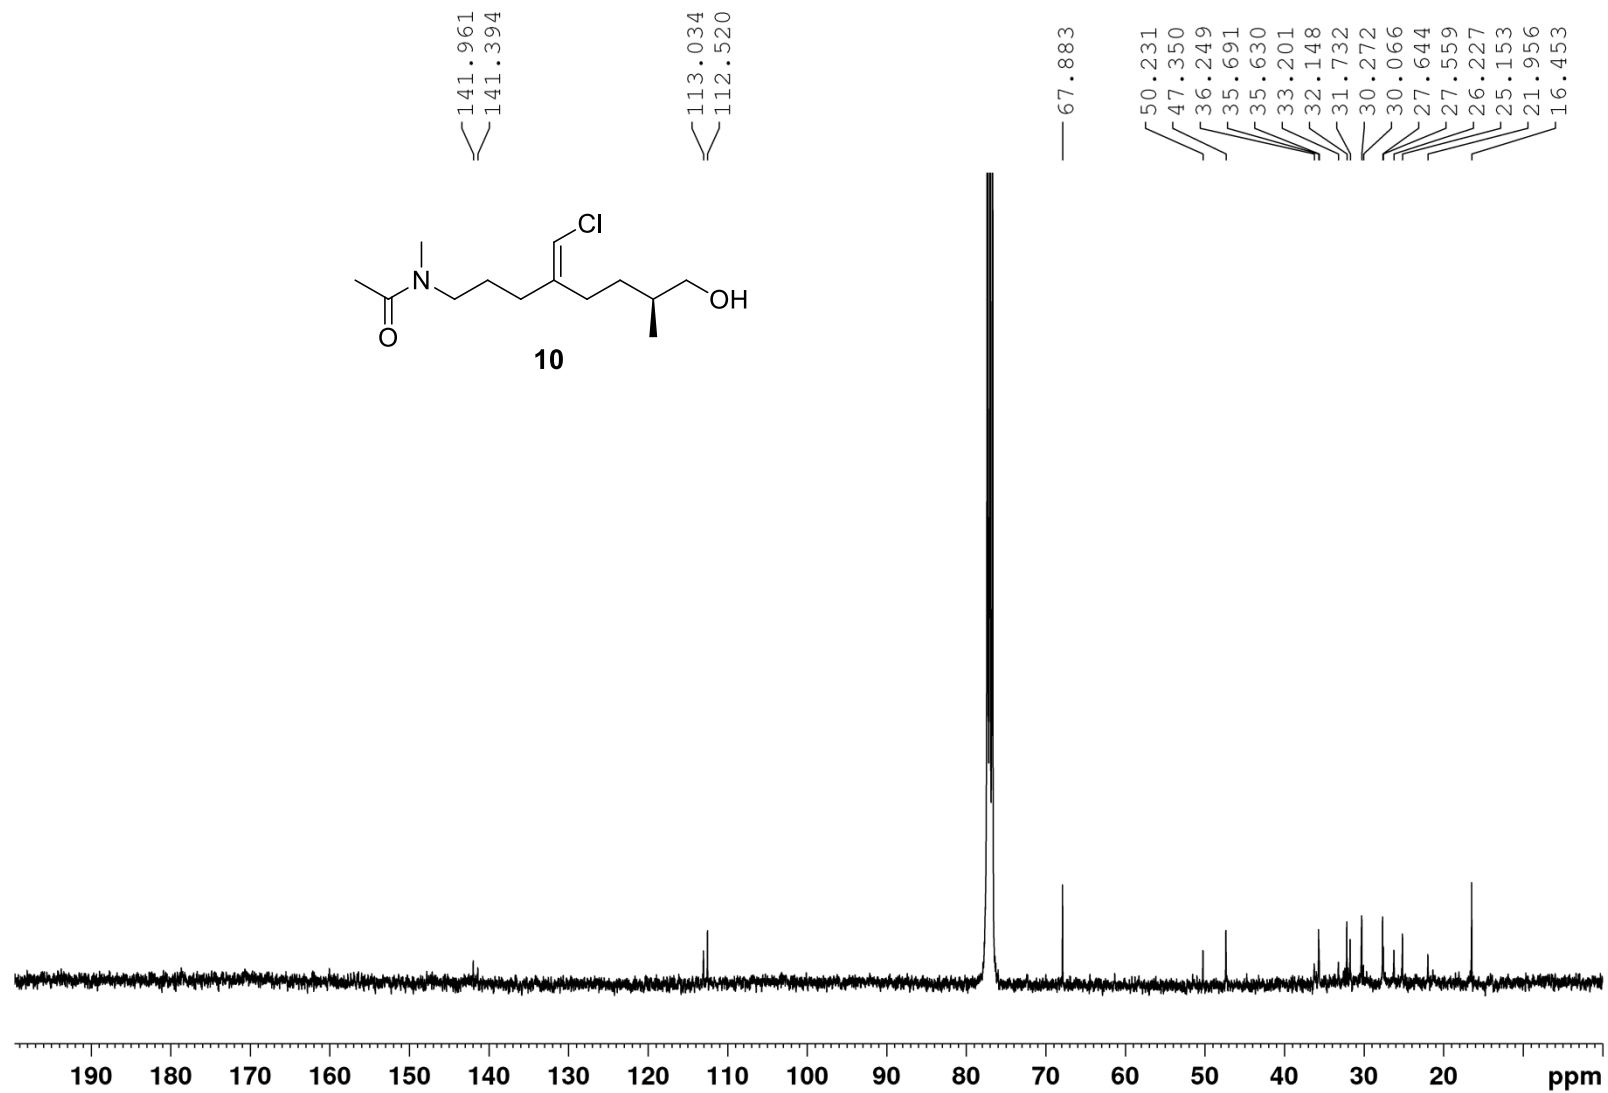

Figure S6. <sup>13</sup>C NMR spectrum of compound 10 (CDCl<sub>3</sub>, 100 MHz).



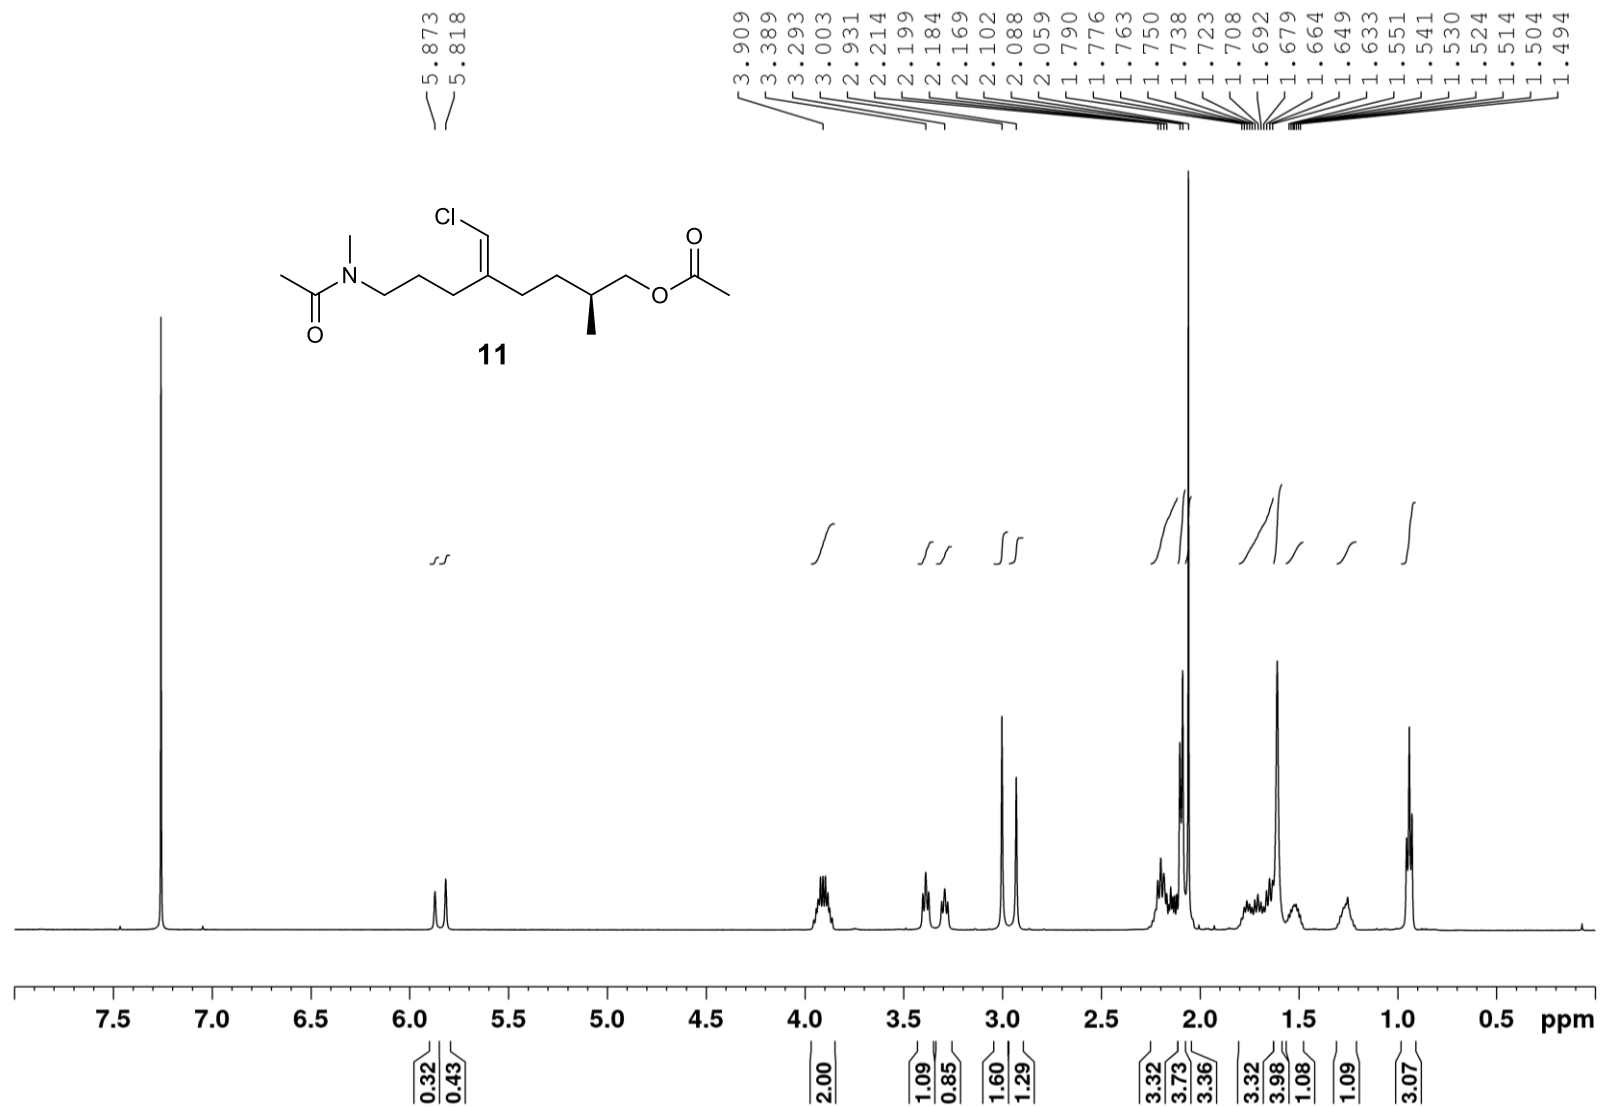

Figure S7. <sup>1</sup>H NMR spectrum of compound **11** (CDCl<sub>3</sub>, 400 MHz).

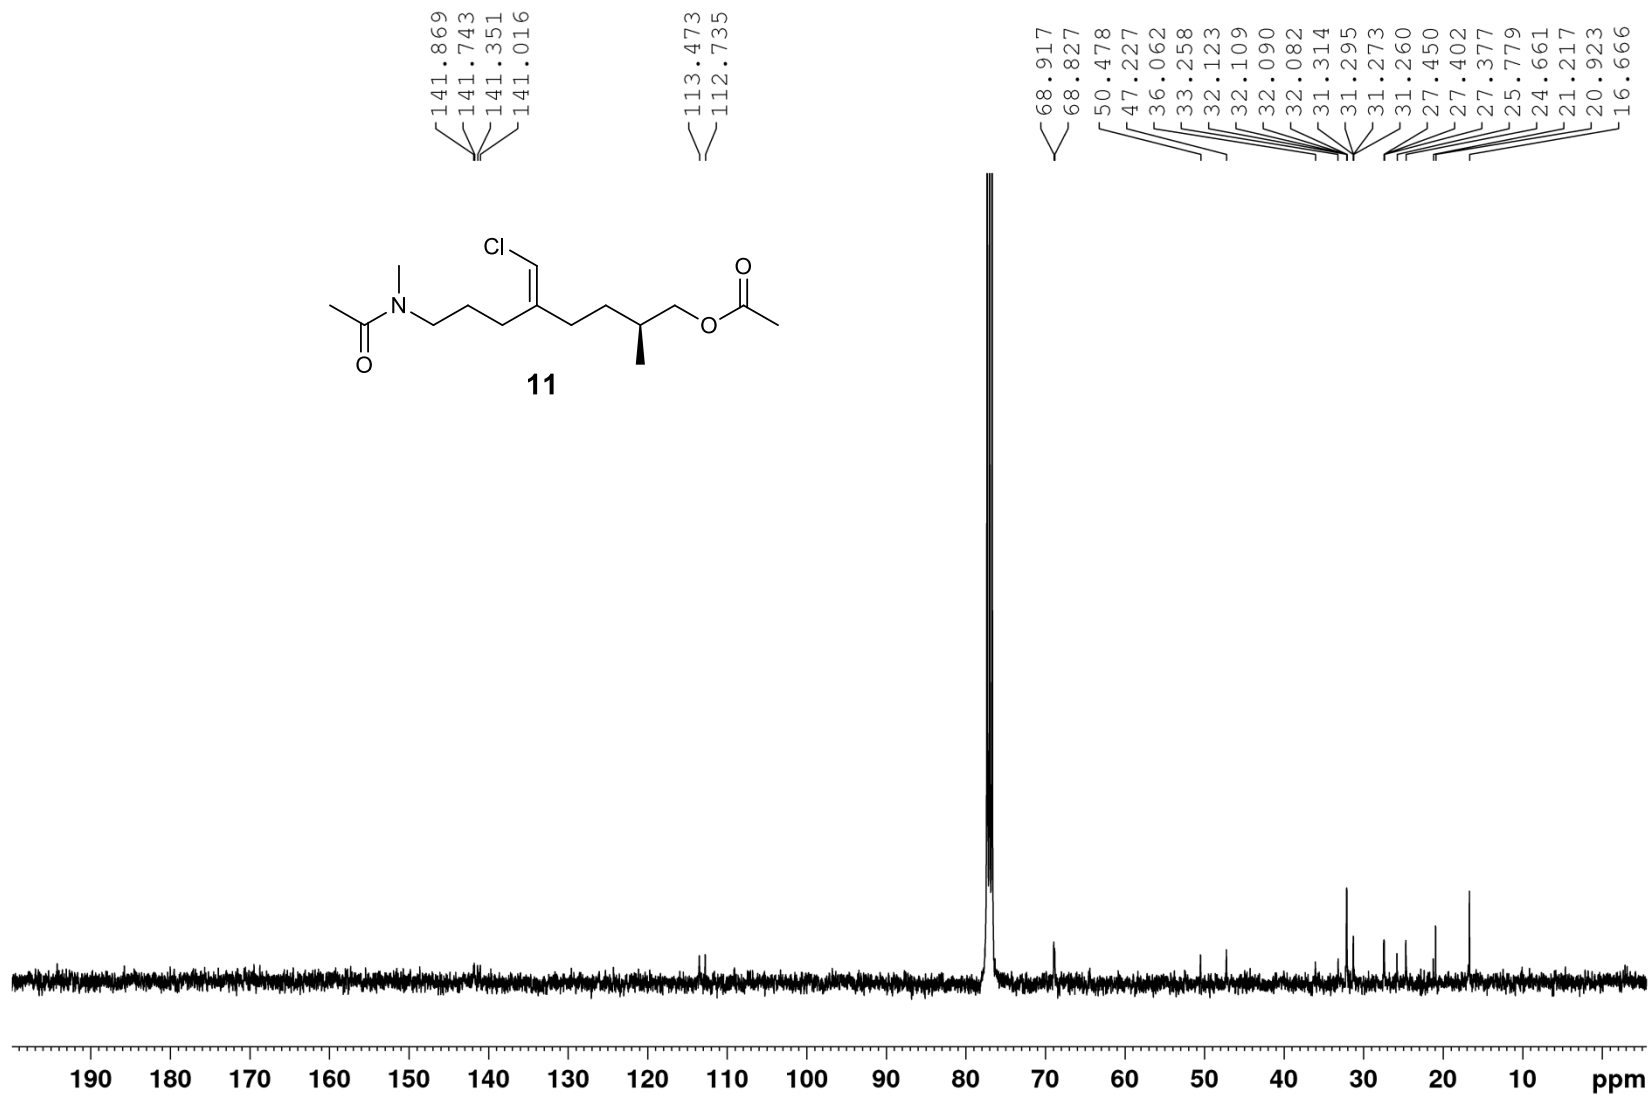

Figure S8. <sup>13</sup>C NMR spectrum of compound **11** (CDCl<sub>3</sub>, 100 MHz).

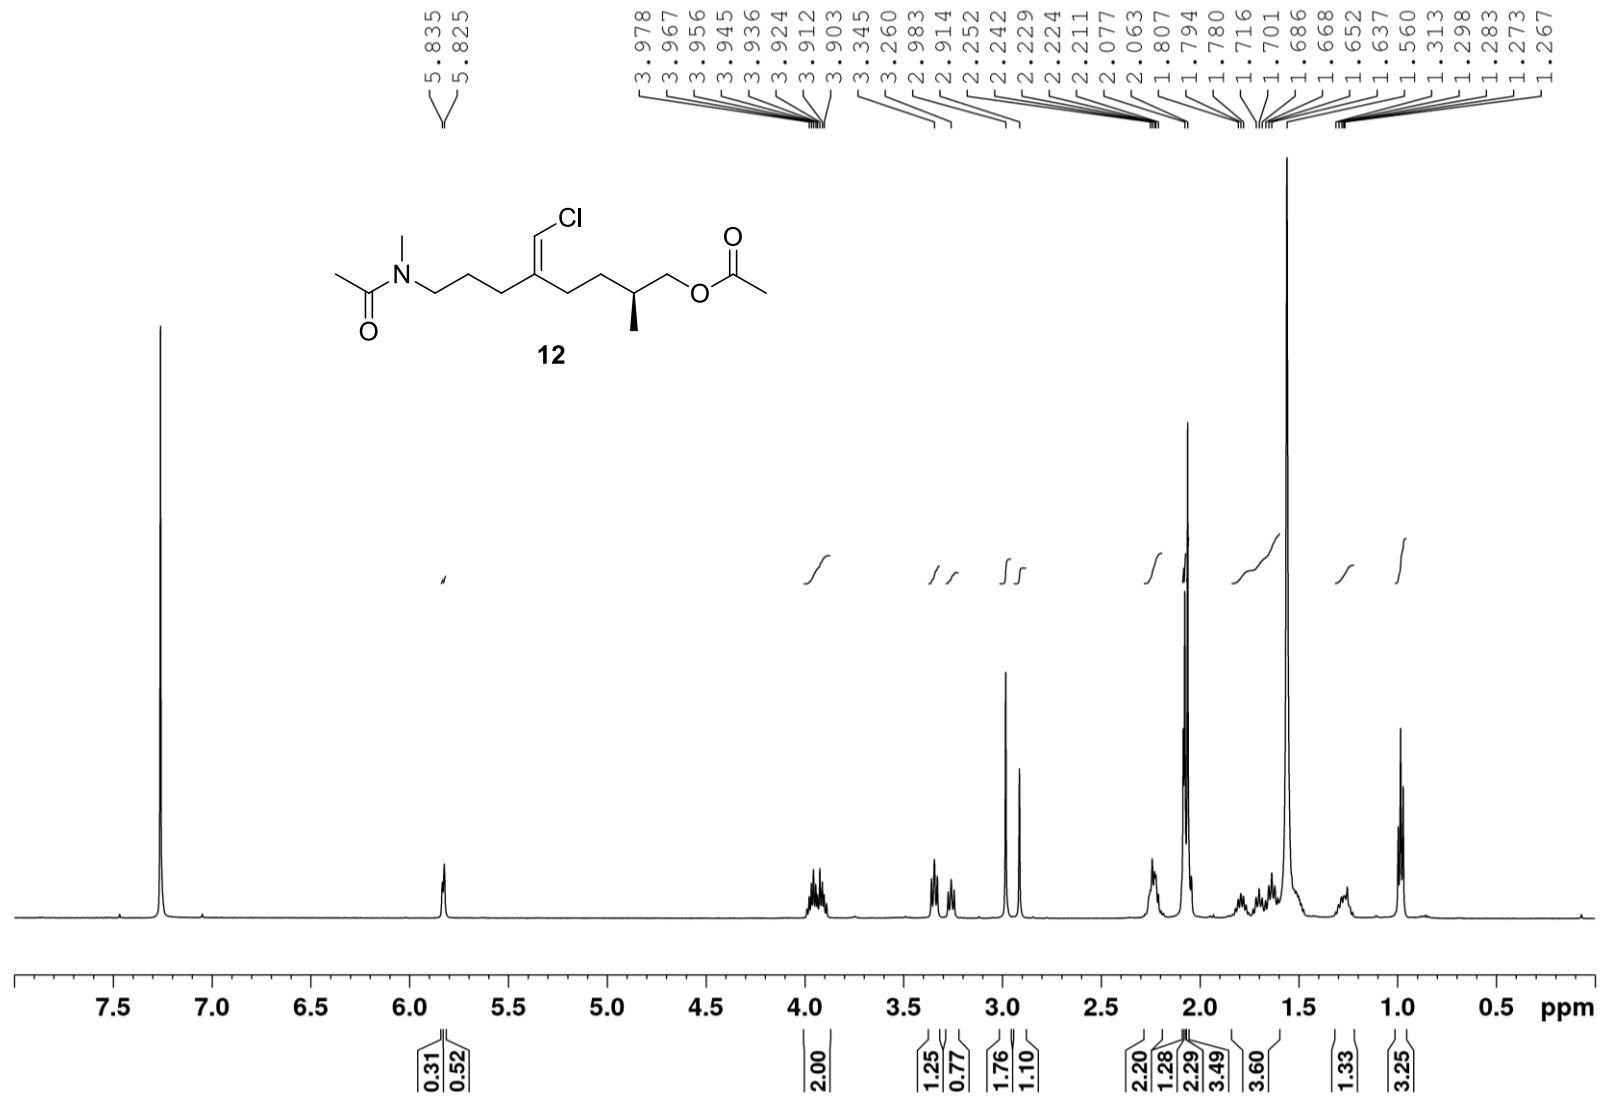

Figure S9. <sup>1</sup>H NMR spectrum of compound 12 (CDCl<sub>3</sub>, 400 MHz).

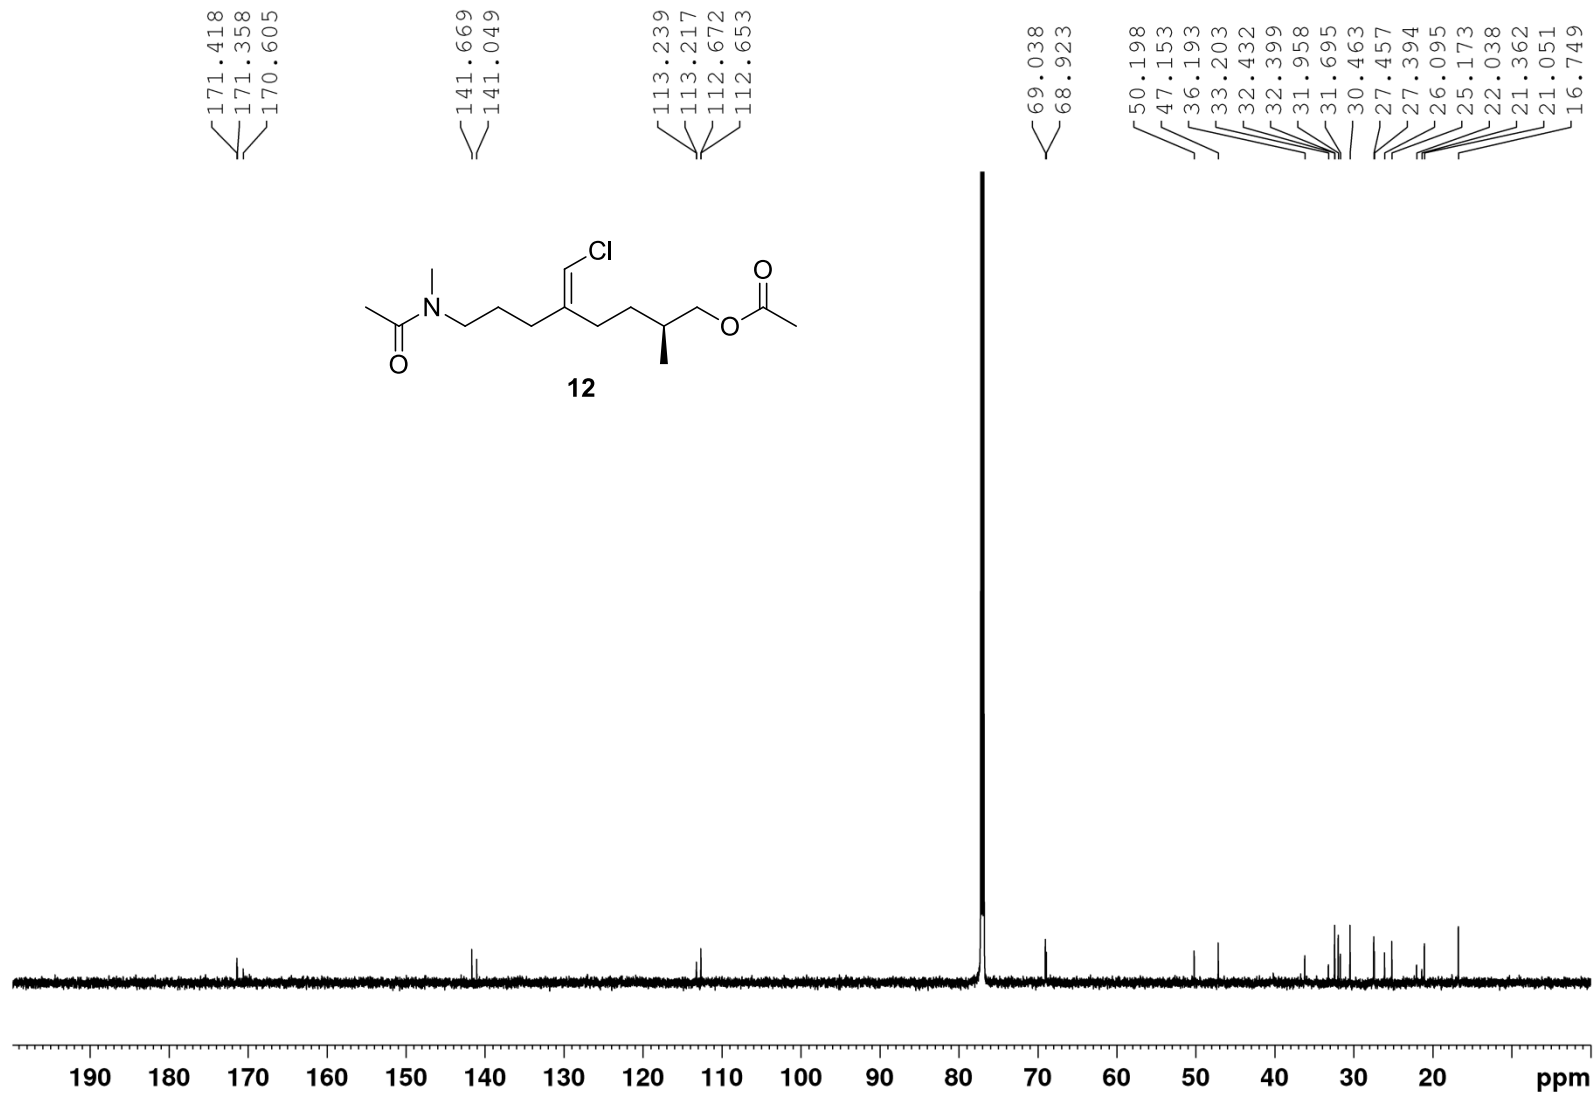

**Figure S10.** <sup>13</sup>C NMR spectrum of compound 12 (CDCl<sub>3</sub>, 100 MHz).

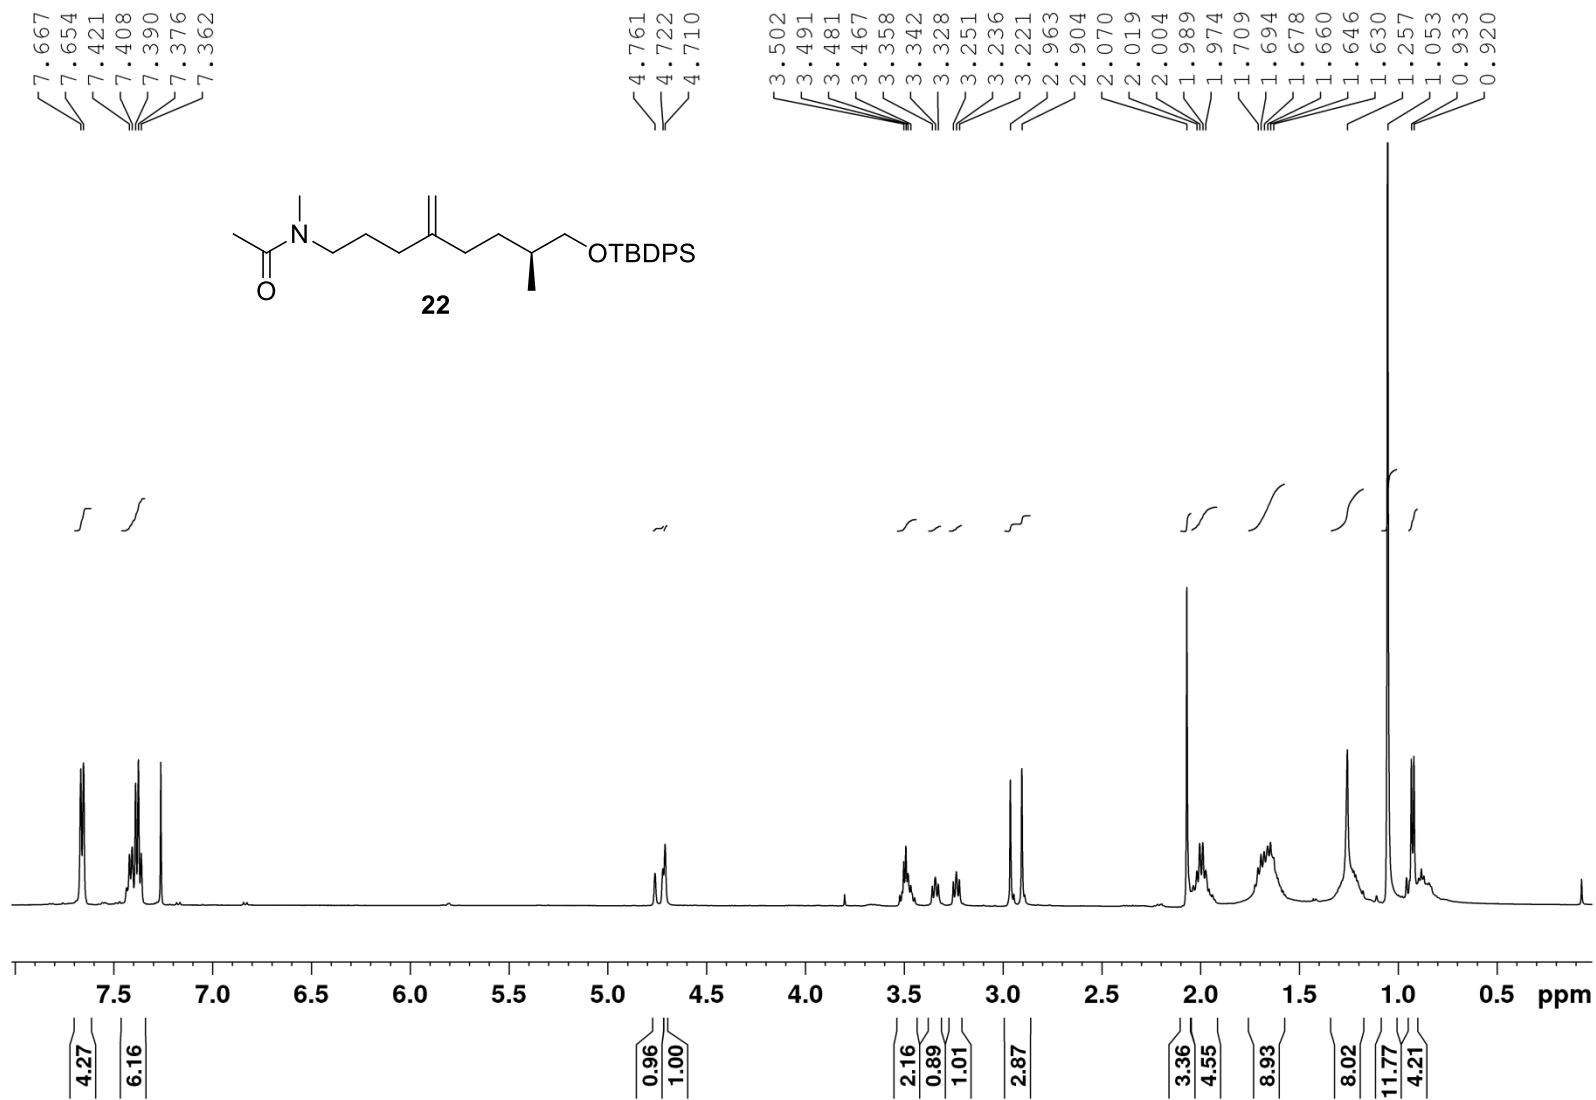

Figure S11. <sup>1</sup>H NMR spectrum of compound **22** (CDCl<sub>3</sub>, 400 MHz).

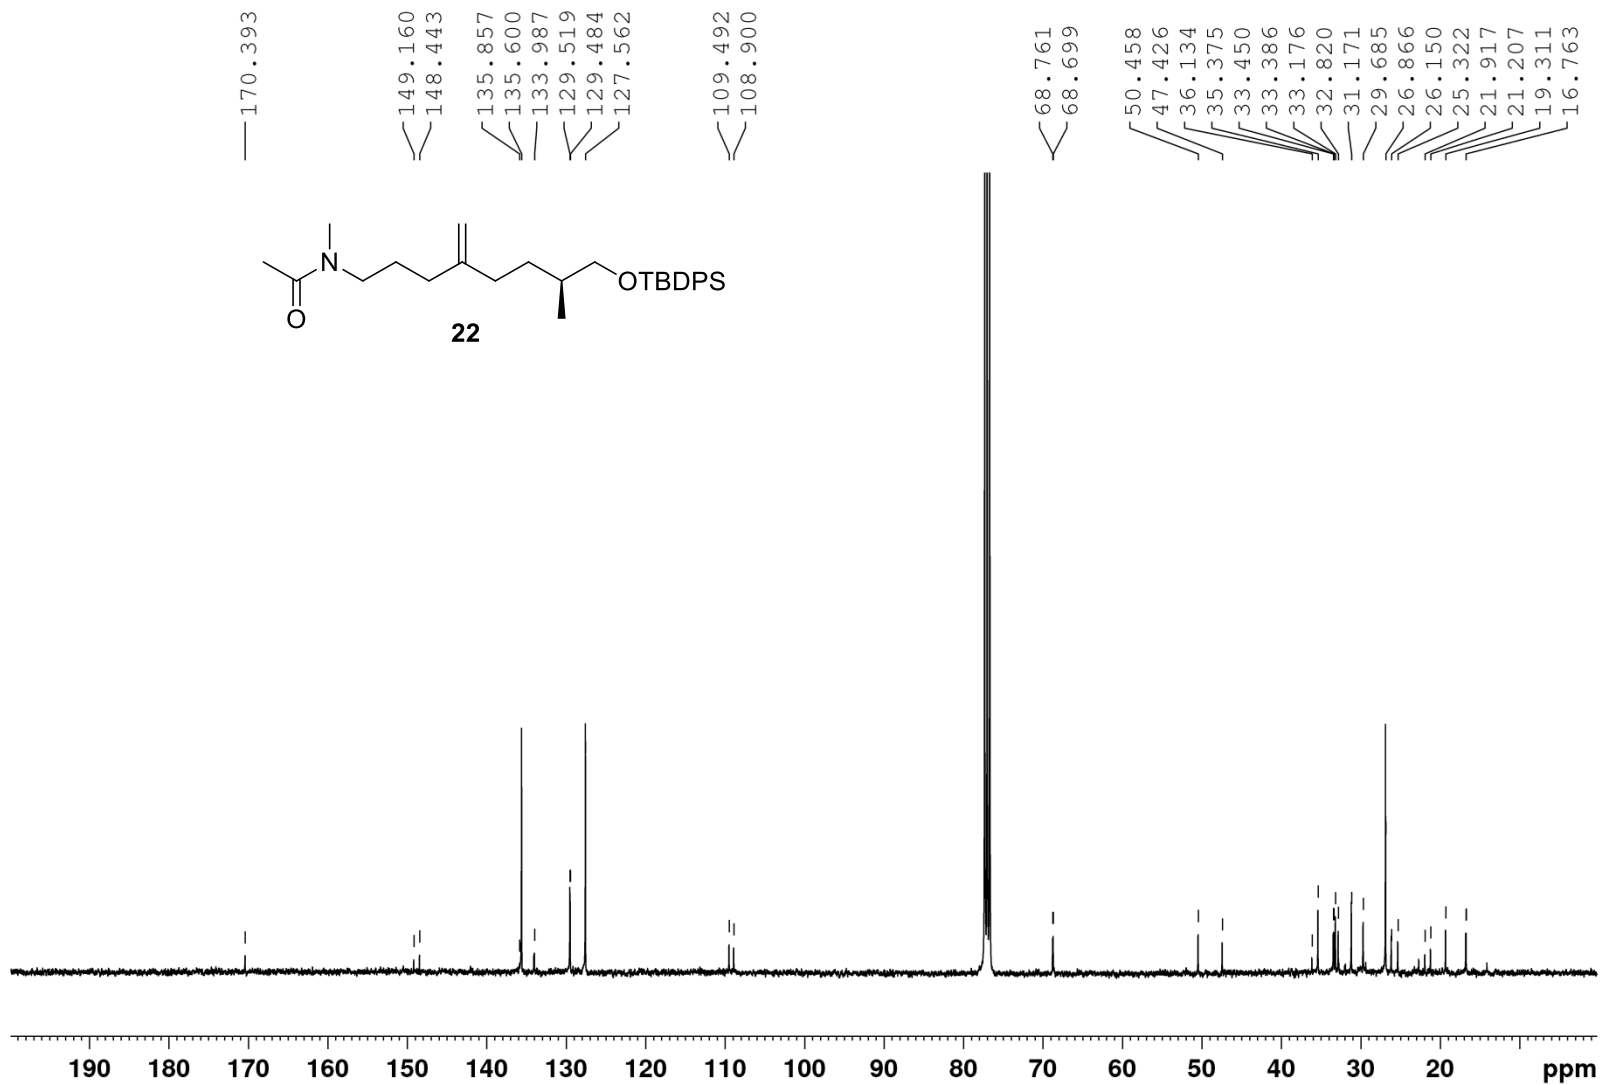

Figure S12.  $^{13}\text{C}$  NMR spectrum of compound 22 ( $\text{CDCl}_3$ , 100 MHz).

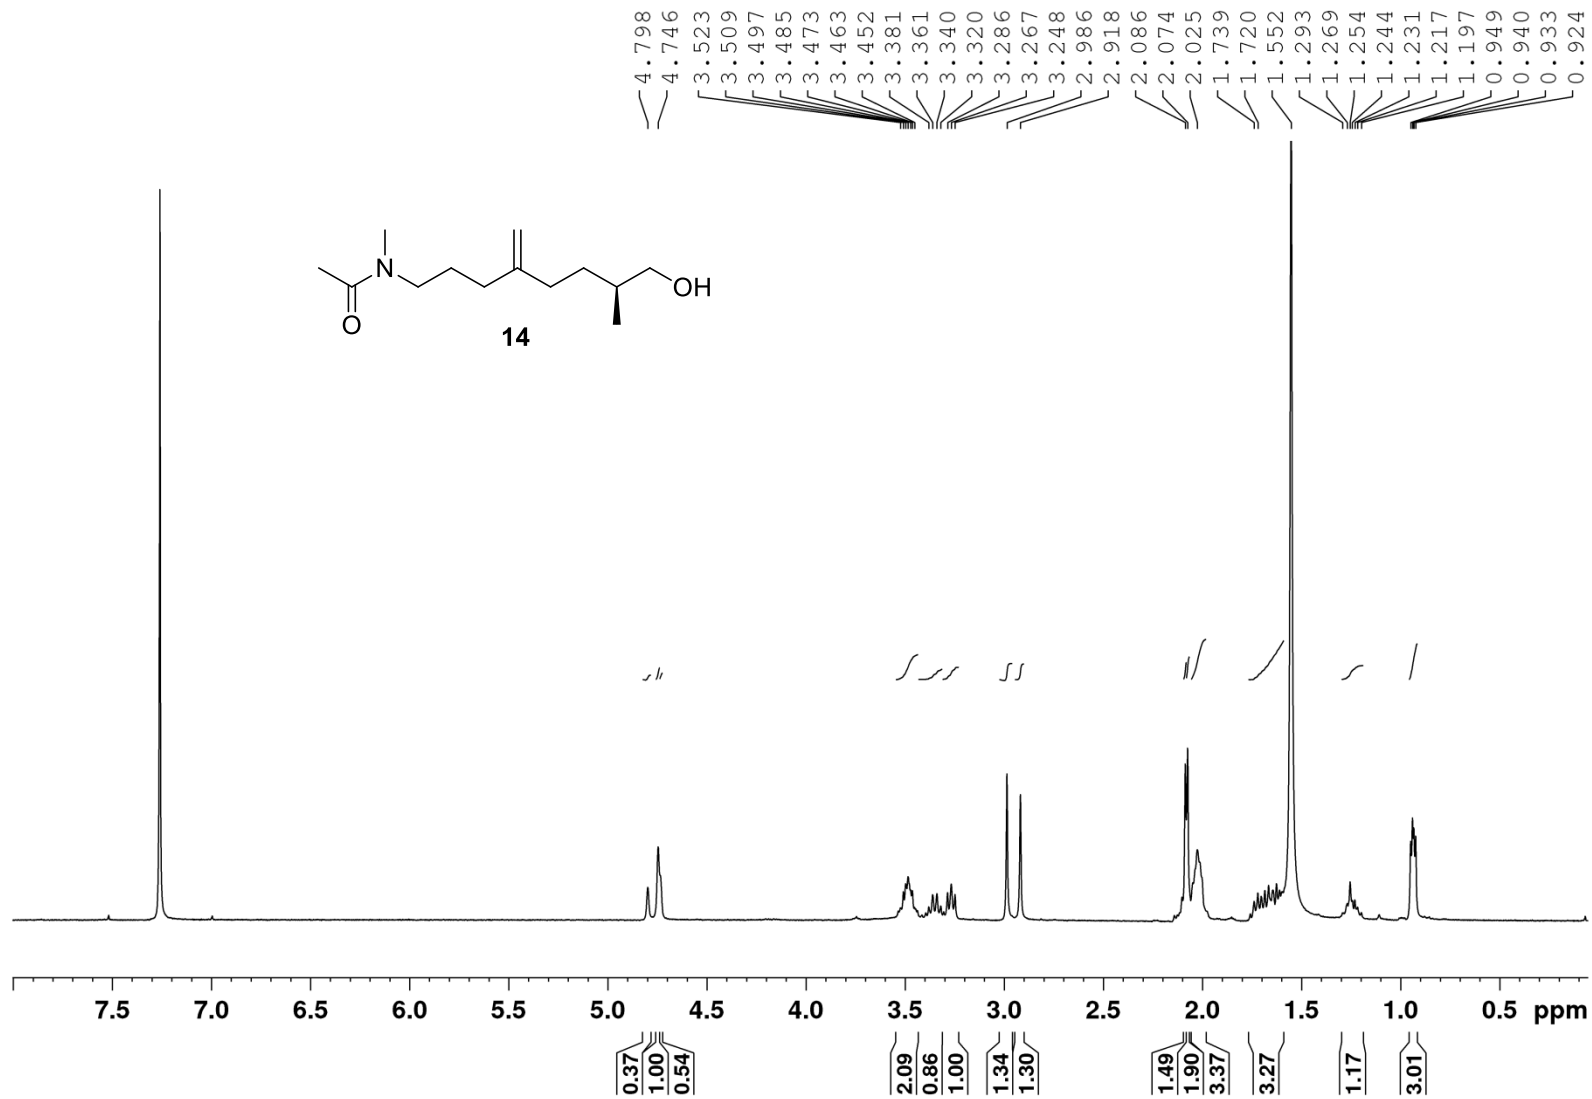

Figure S13. <sup>1</sup>H NMR spectrum of compound 14 (CDCl<sub>3</sub>, 400 MHz).

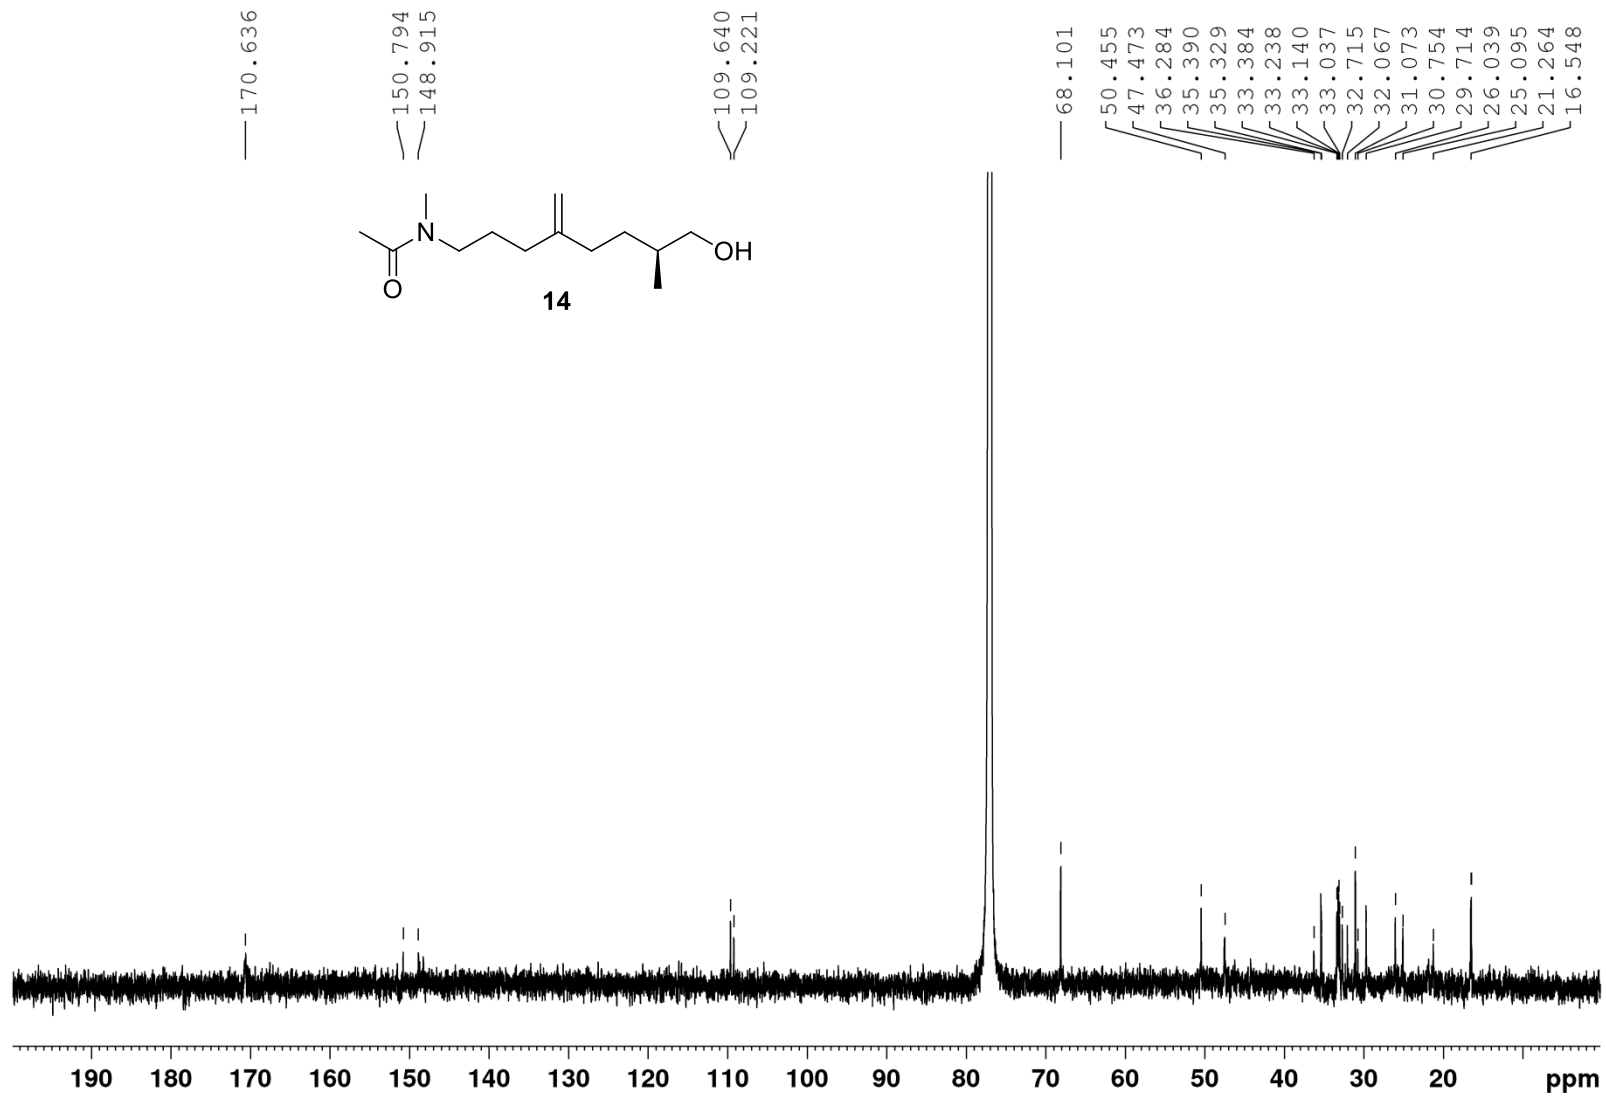

Figure S14. <sup>13</sup>C NMR spectrum of compound 14 (CDCl<sub>3</sub>, 100 MHz).



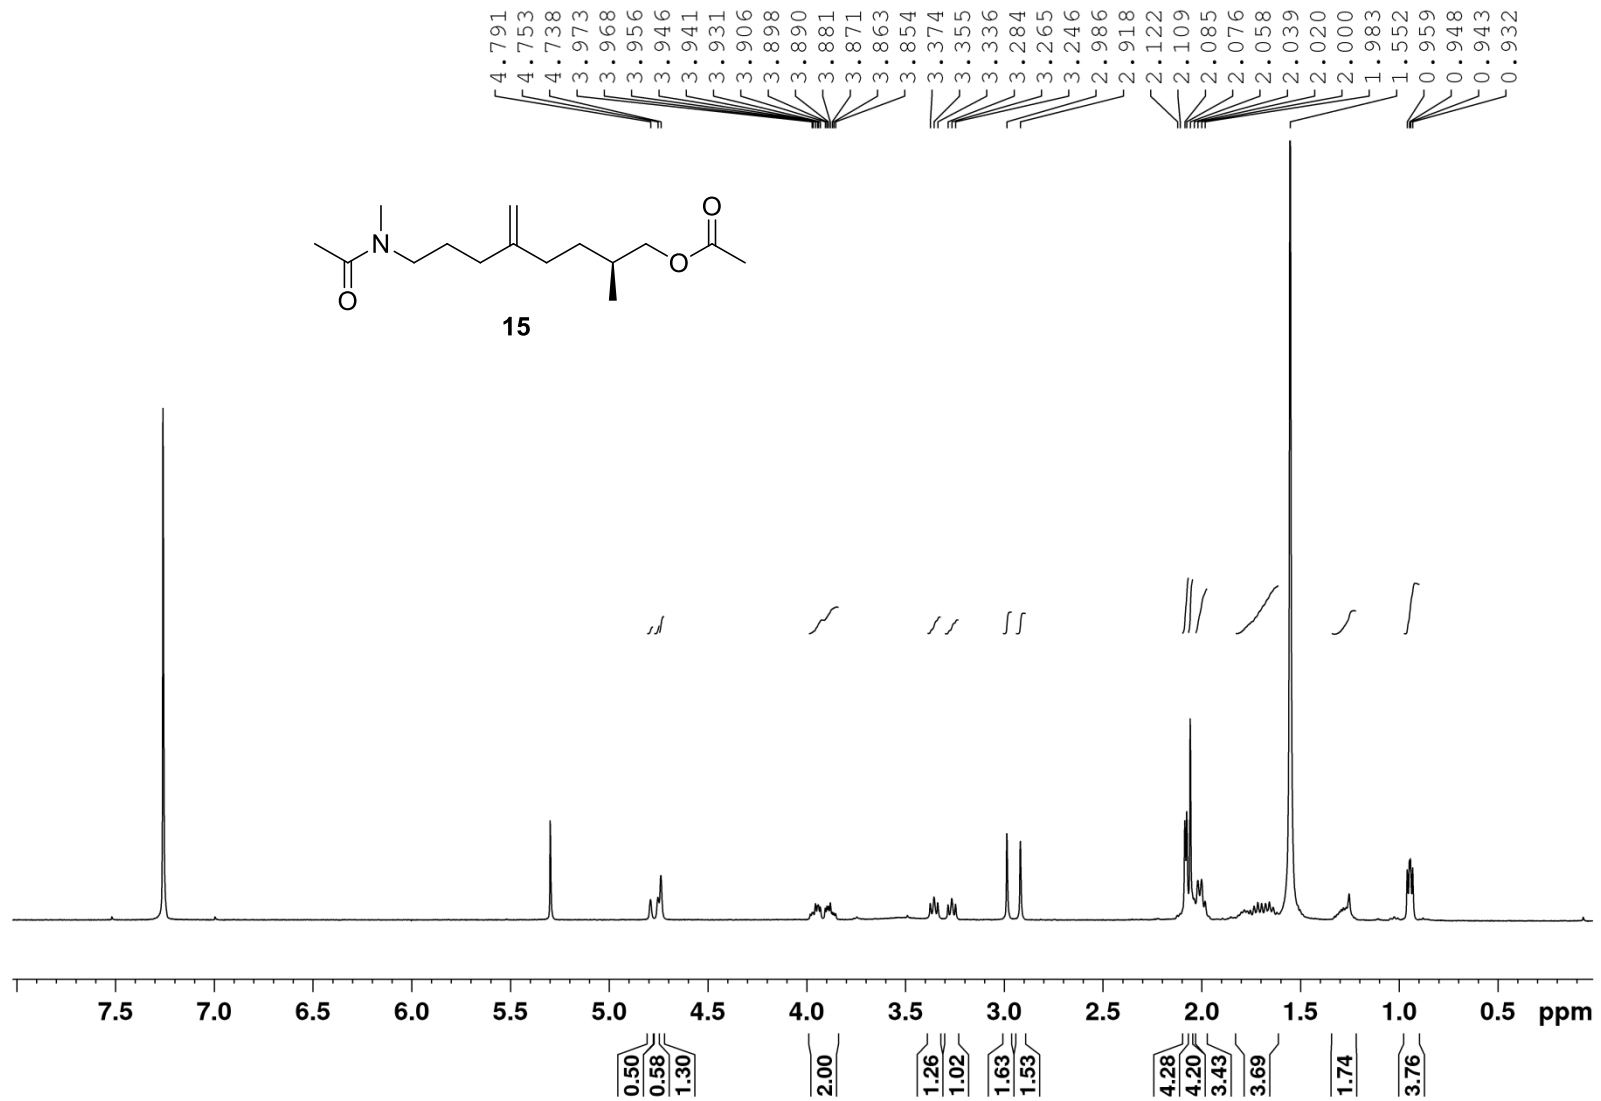

Figure S15. <sup>1</sup>H NMR spectrum of compound **15** (CDCl<sub>3</sub>, 400 MHz).

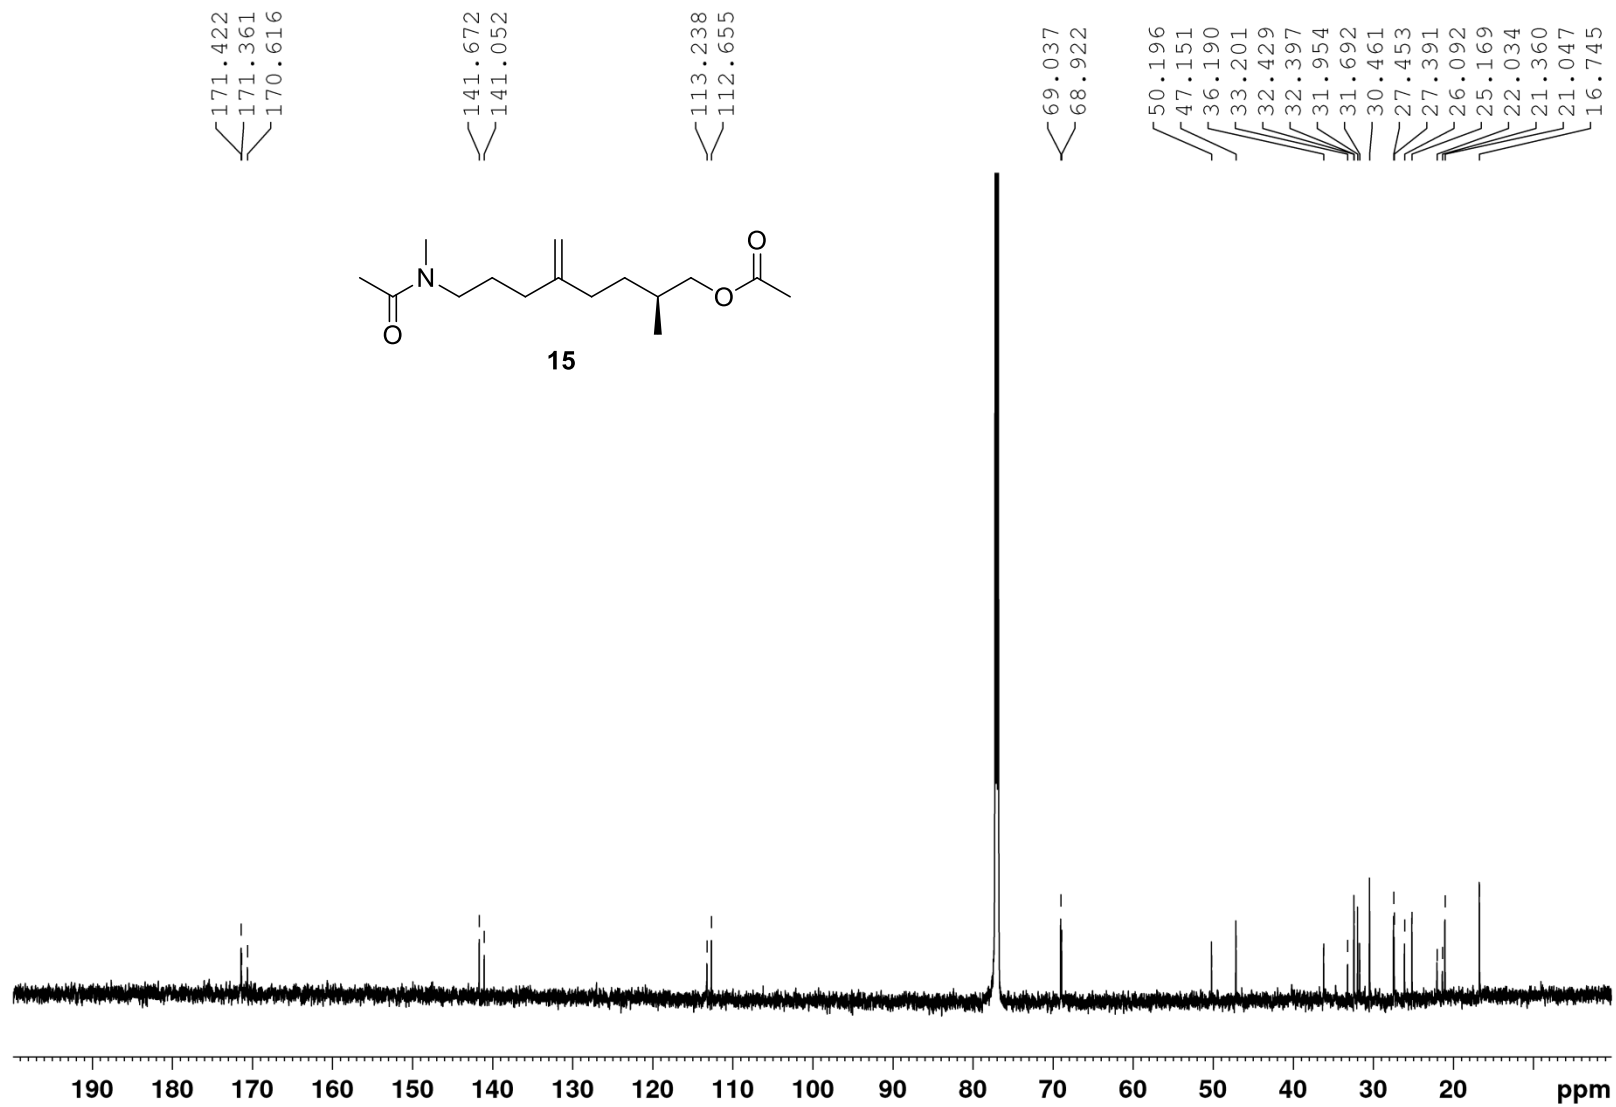

Figure S16.  $^{13}\text{C}$  NMR spectrum of compound **15** ( $\text{CDCl}_3$ , 100 MHz).
